# Supplementary material for: Angiotensin II Attenuates the Bioactivities of Human Endothelial Progenitor Cells via Downregulation of β2-Adrenergic Receptor
Source: Hindawi journal article supplement (doi:10.1155/2018/7453161), 2018-10-29
Supplement: f1 [file 7453161.f1.pdf]

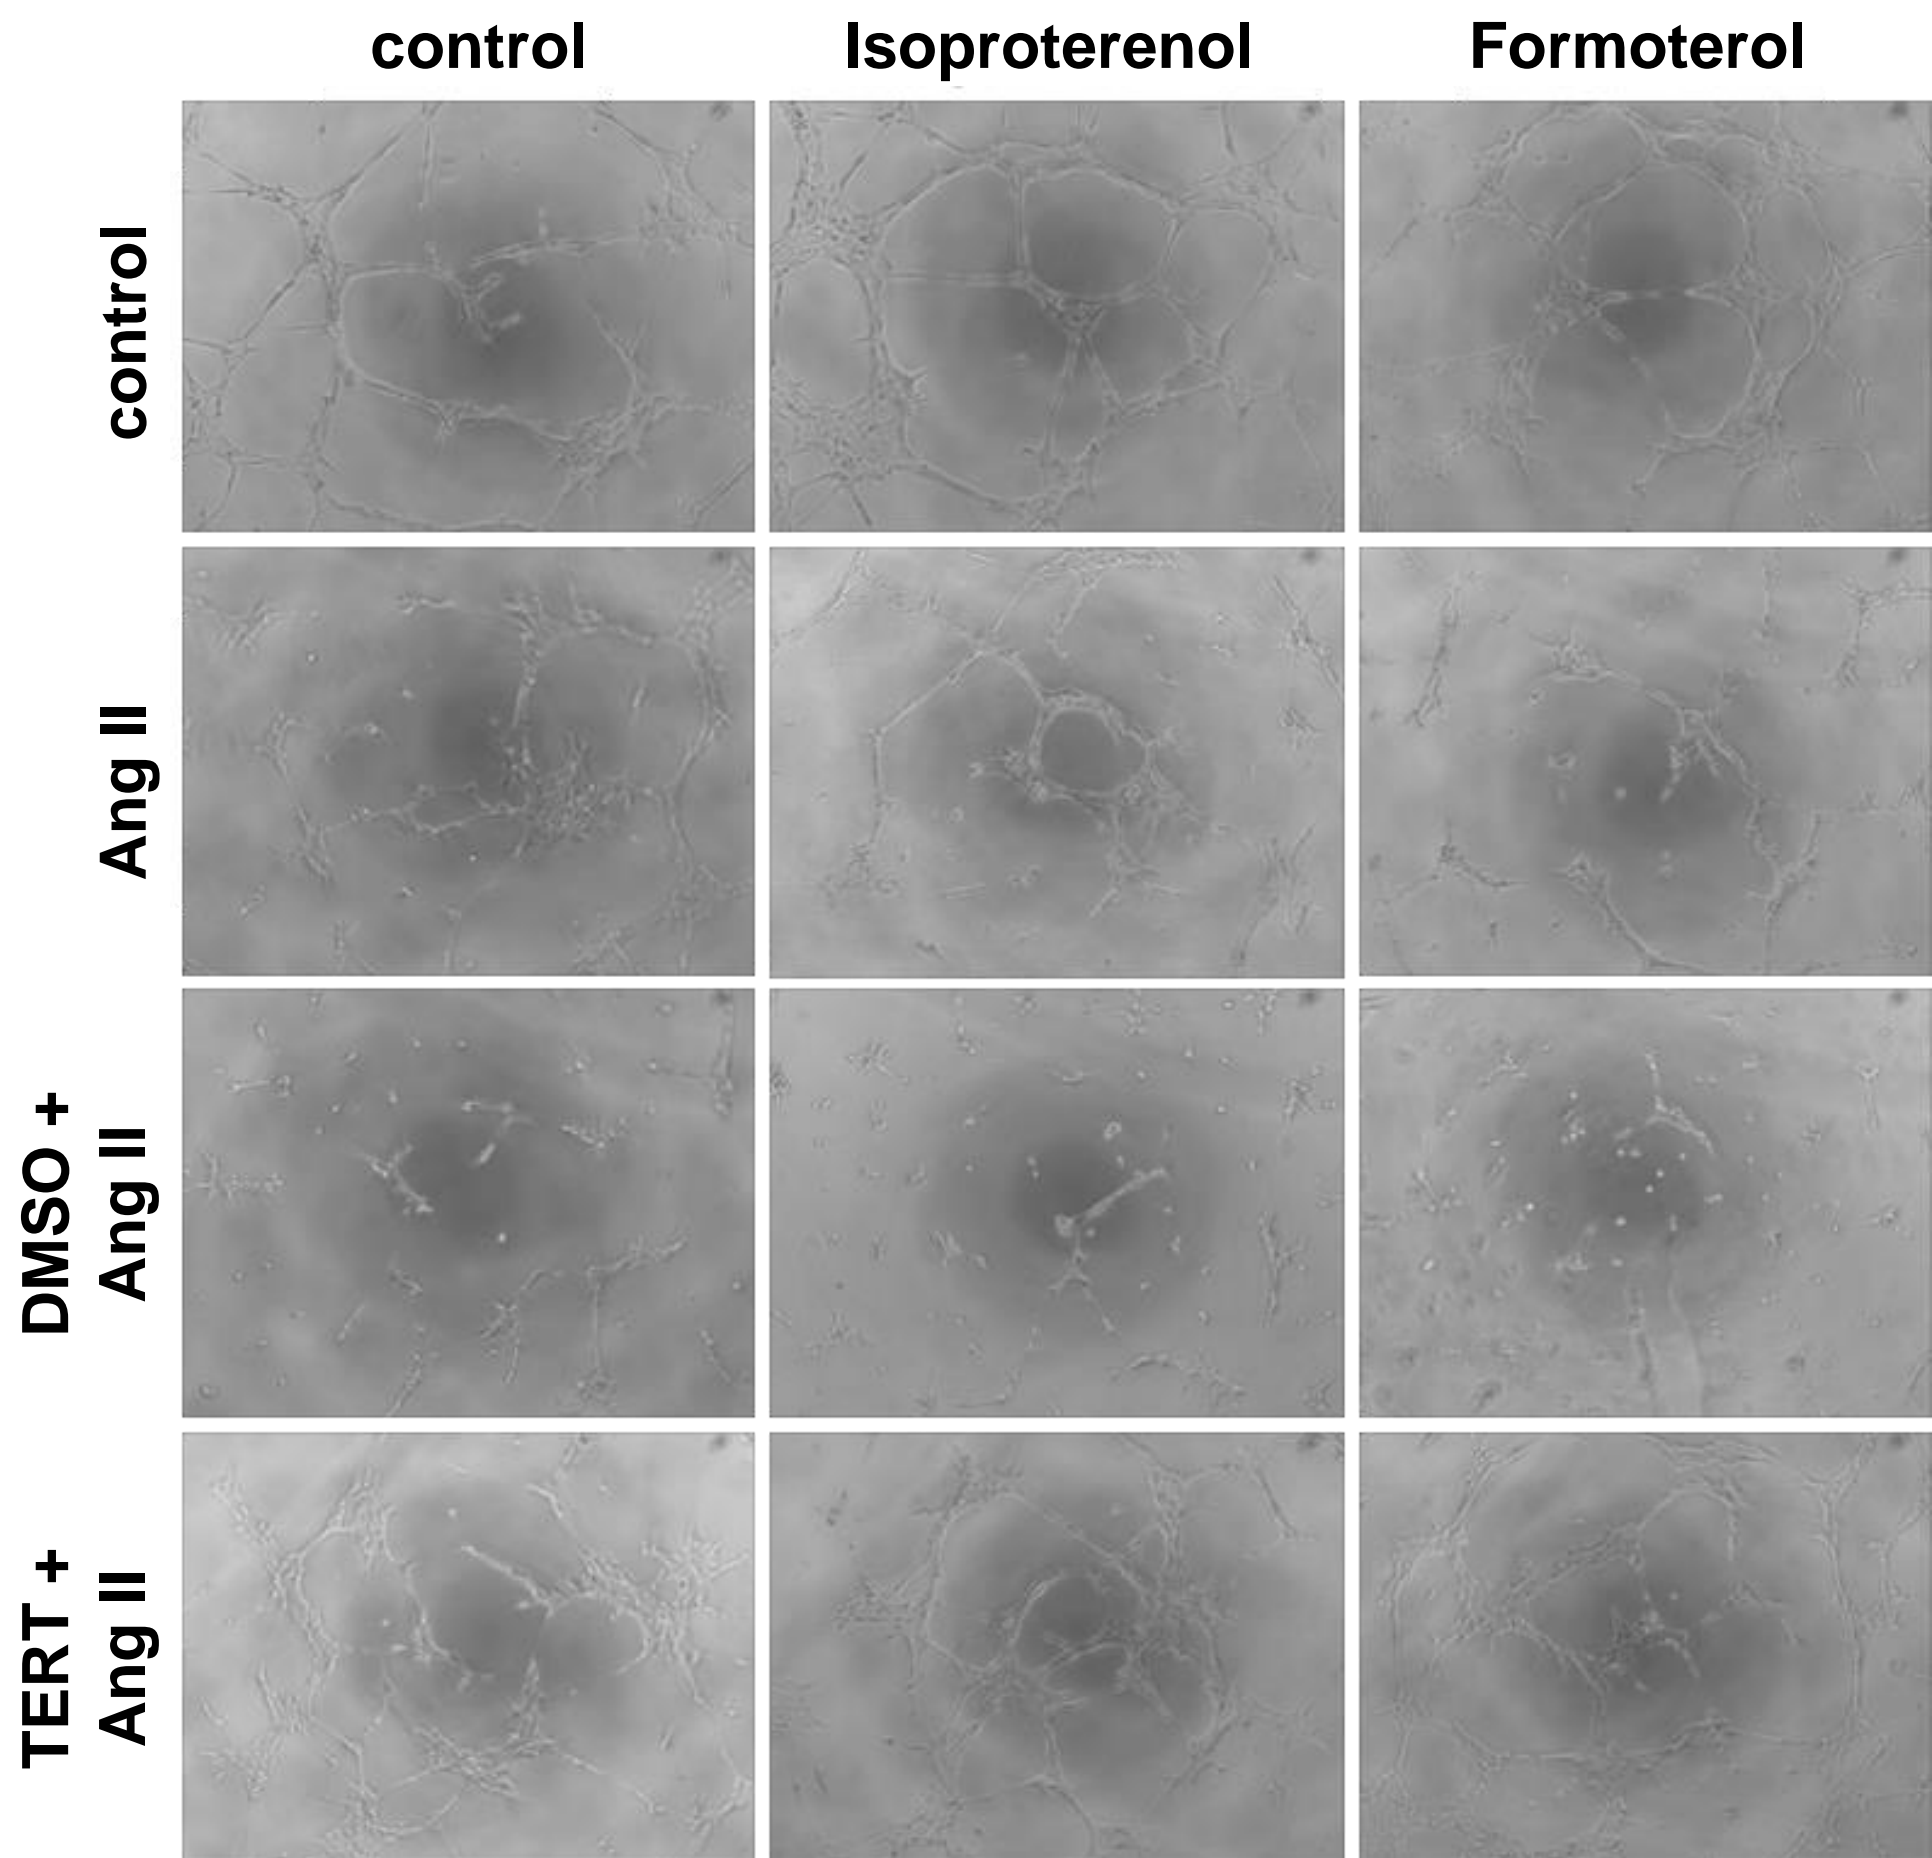

### Supplementary Figure 1

Human EPCs were pretreated with an AT1R blocker and incubated with Ang II for 24hr. Each group of cells were seeded onto Matrigel GFR with or without ADRB2 agonists. Tube formation was observed during 6hr. All experiments were performed at least triplicates.

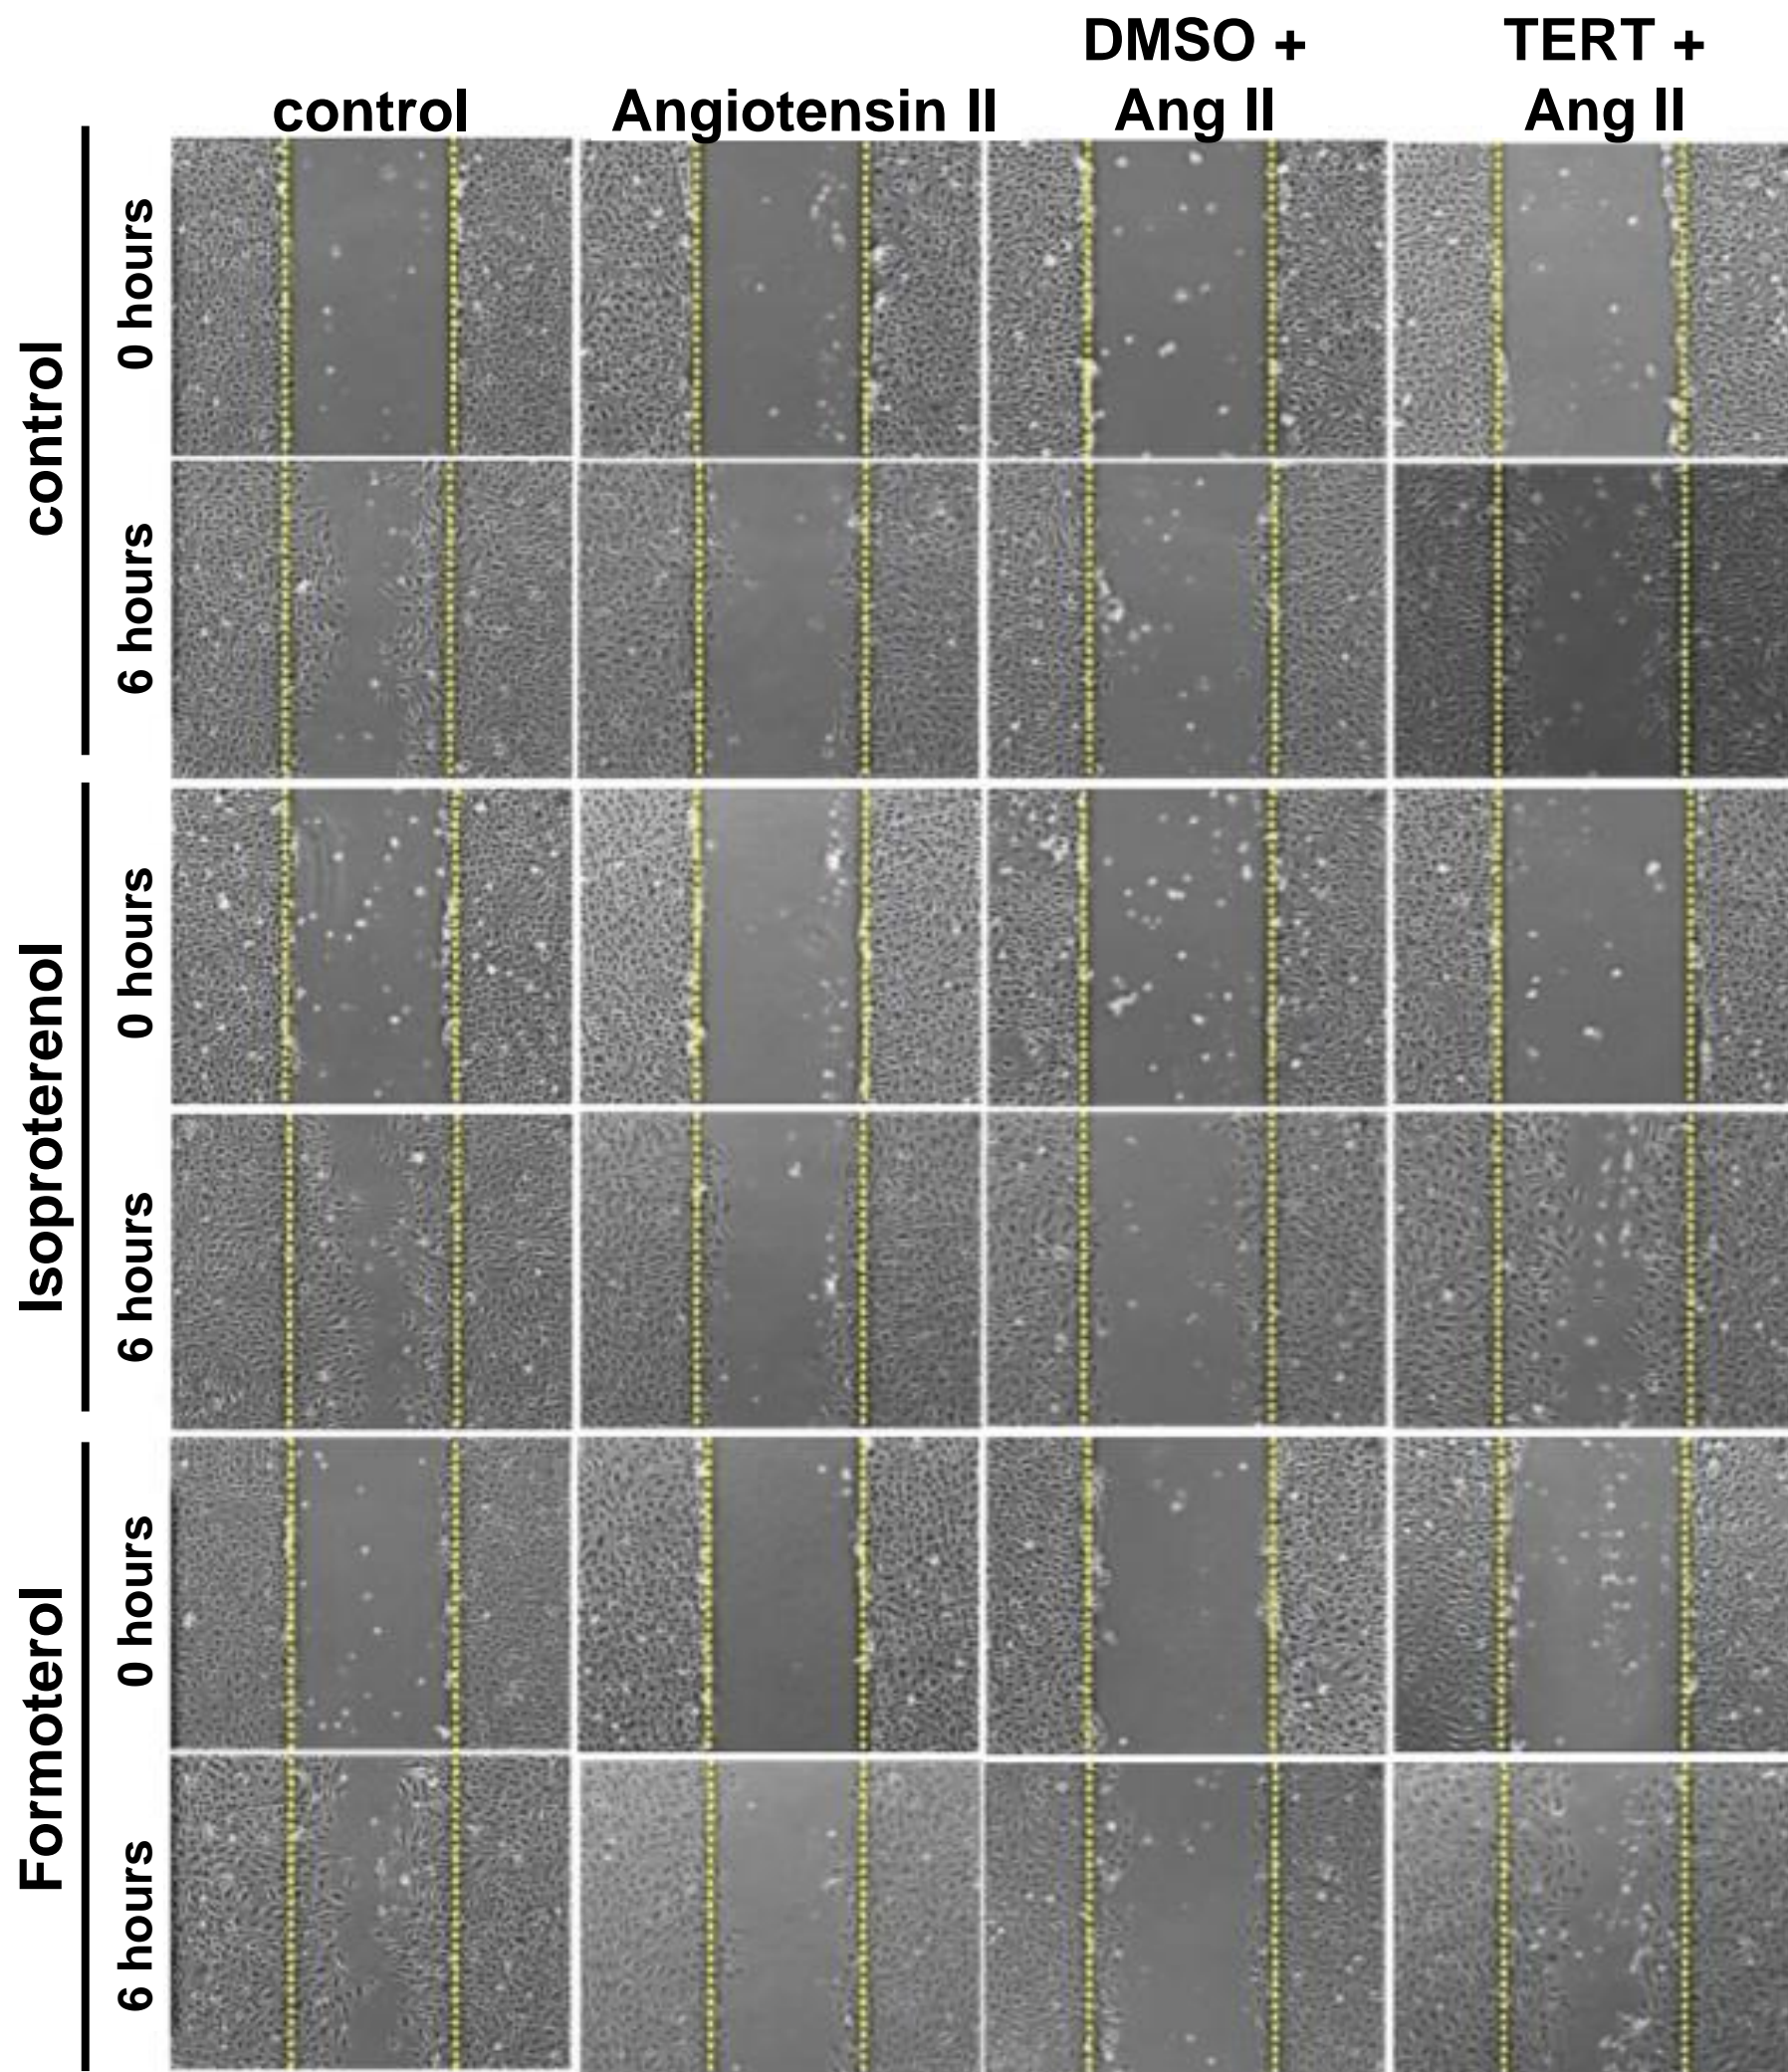

### Supplementary Figure 2

Migration ability was examined using the scratch wound healing assay. Each group of EPCs was seeded and observed migratory capacity for 6hr. All experiments were performed at least triplicates.
